# Supplementary material for: Anion–cation synergistic doping strategy on a Ga2O3 scaffold for improving electron extraction and transport in a CH3NH3PbCl3-based photodetector
Source: Royal Society of Chemistry journal article supplement (doi:10.1039/d2tc02186b), 2022-01-01
Supplement: d2tc02186b1.pdf [file d2tc02186b1.pdf]

## Supporting Information

# Anion-cation synergistic doping strategy on Ga<sub>2</sub>O<sub>3</sub> scaffold for improving electron extraction and transport in CH<sub>3</sub>NH<sub>3</sub>PbCl<sub>3</sub>-based photodetector

Shuo Liu,<sup>a</sup> Shujie Jiao,<sup>\*a</sup> Hongliang Lu,<sup>a</sup> Yue Zhao,<sup>a</sup> Yimin Jin,<sup>a</sup> Song Yang,<sup>a</sup> Dongbo Wang,<sup>a</sup> Shiyong Gao,<sup>a</sup> Jinzhong Wang<sup>a</sup> and Liancheng Zhao<sup>a,b</sup>

<sup>a</sup> School of materials science and engineering, Harbin Institute of Technology, Harbin, 150001, China.

<sup>b</sup> School of Materials Science and Engineering, Shanghai Jiao Tong University, Shanghai, 200000, China

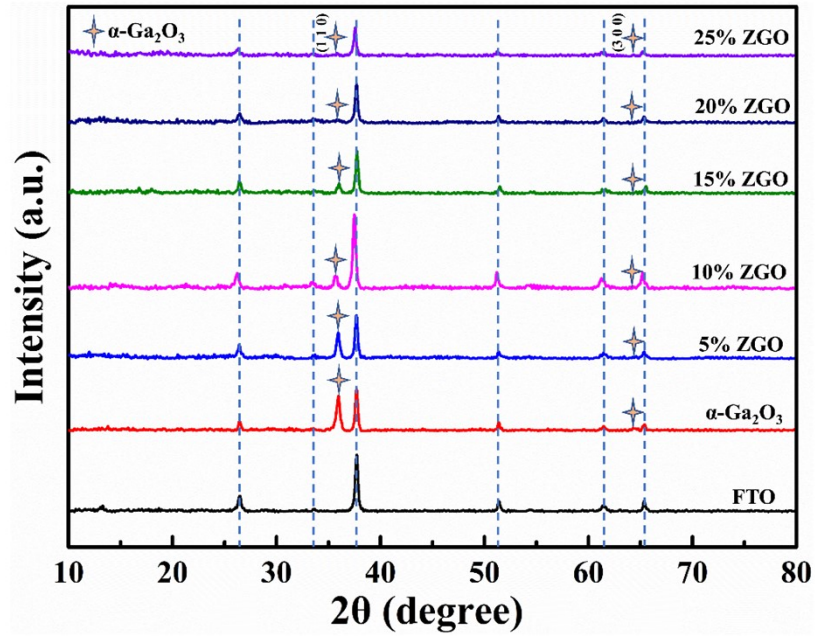

**Fig. S1** XRD pattern of 5%-25% Zn(Ac)<sub>2</sub>-doping  $\alpha$ -Ga<sub>2</sub>O<sub>3</sub> nanorods, and FTO substrate as well as pristine  $\alpha$ -Ga<sub>2</sub>O<sub>3</sub> nanorods for comparison.

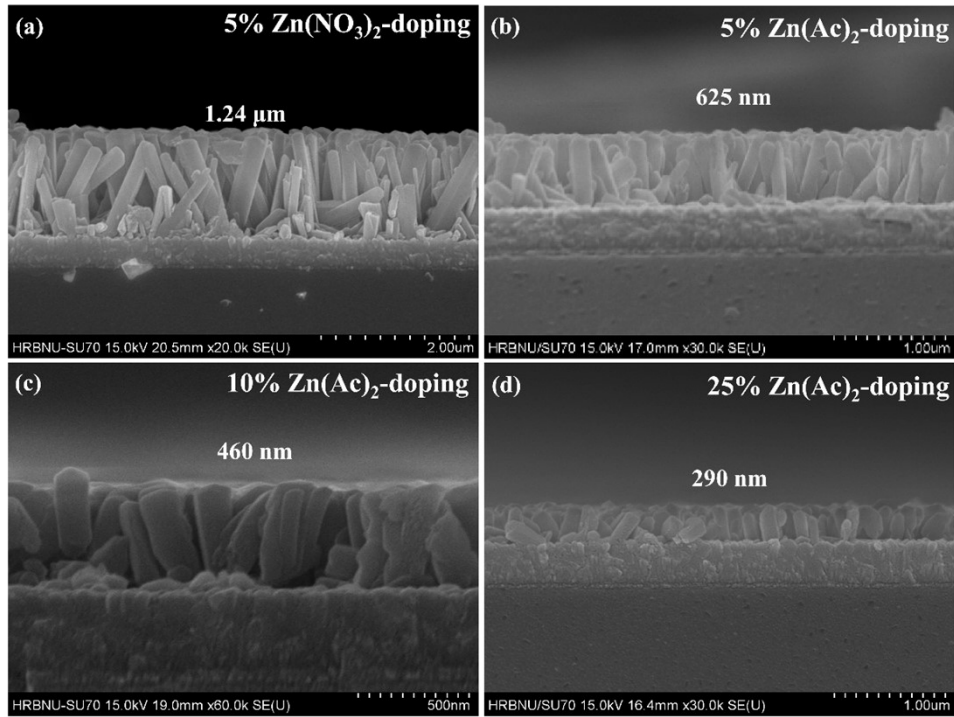

**Fig. S2** (a) Cross-sectional SEM image of ZGO nanorods with 5% Zn(NO<sub>3</sub>)<sub>2</sub>-doping. (b)-(d) Cross-sectional SEM images of ZGO nanorods with 5%,10%, 25% Zn(Ac)<sub>2</sub>-doping, respectively.

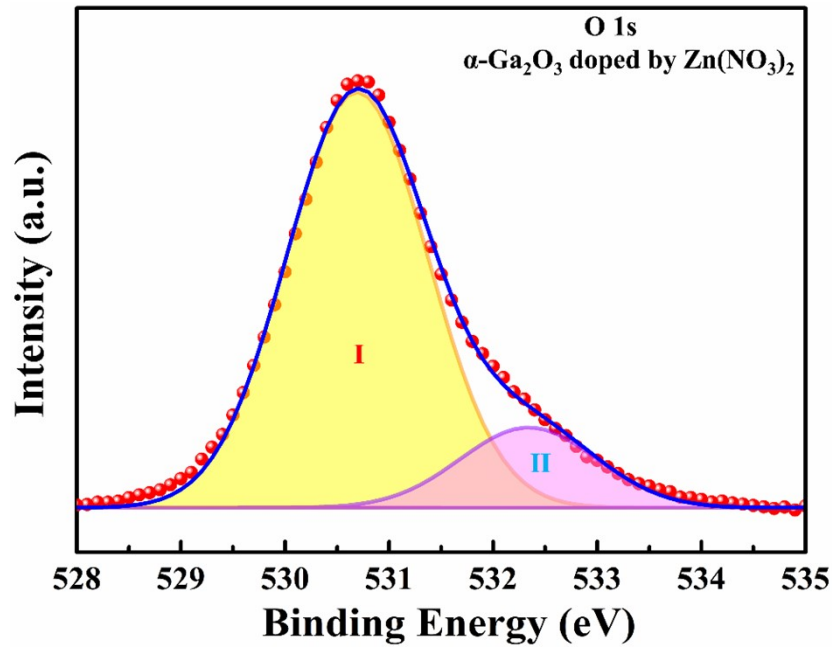

**Fig. S3** XPS core-level spectrum of O 1s in the  $\alpha$ -Ga<sub>2</sub>O<sub>3</sub> nanorods doped by 5% Zn(NO<sub>3</sub>)<sub>2</sub>.

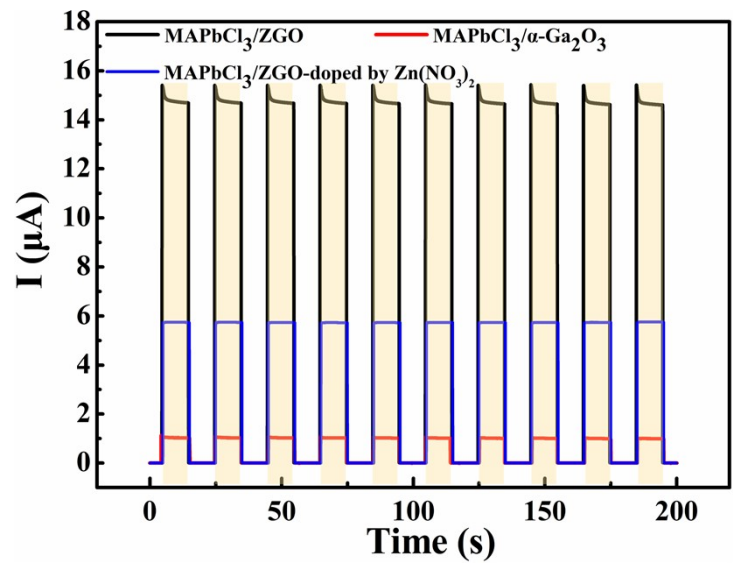

**Fig. S4** I-t curves of the polycrystalline MAPbCl<sub>3</sub>/α-Ga<sub>2</sub>O<sub>3</sub>, polycrystalline MAPbCl<sub>3</sub>/ZGO, and polycrystalline MAPbCl<sub>3</sub>/ZGO-doped by Zn(NO<sub>3</sub>)<sub>2</sub> devices.

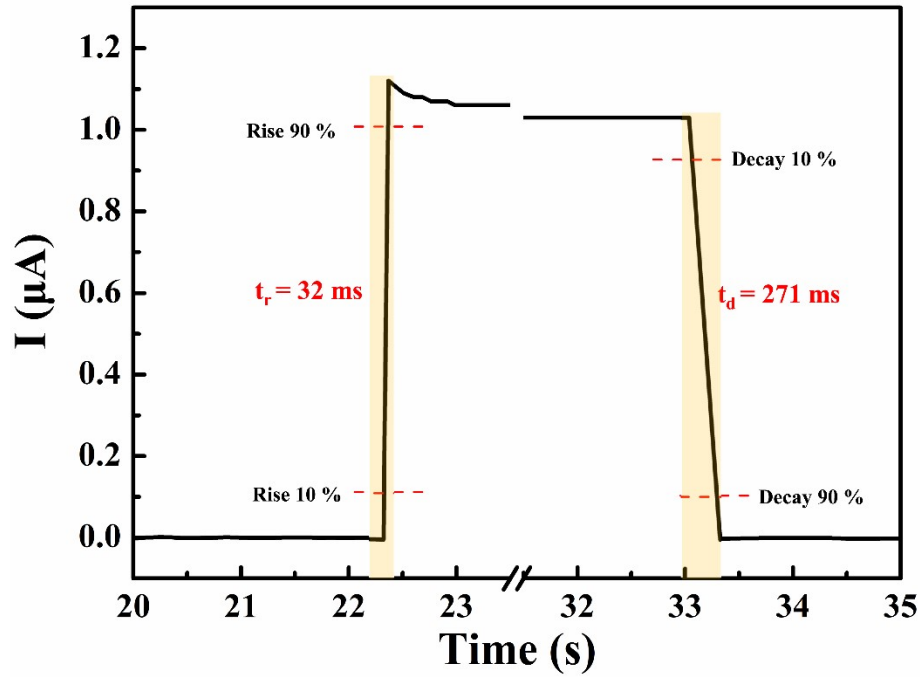

Fig. S5 Response time of the polycrystalline MAPbCl<sub>3</sub>/α-Ga<sub>2</sub>O<sub>3</sub> device.

In the SCLC curves, the dark current is almost linearly dependent on the applied voltage in the low voltage region, indicating an Ohmic region. Then, the current increases quickly in the intermediate voltage region, reflecting the trap-filling limited (TFL) region. This is relevant to the complete filling of the trap states by the injected charge carriers. At higher bias, the current shows a quadratic dependence ( $I \propto V^2$ ) fitting with the Mott-Gurney law:

$$J_d = \frac{9\varepsilon\varepsilon_0\mu V^2}{8L^3}$$

where  $J_d$  is the current density,  $V$  is the applied voltage,  $L$  is the thickness of the perovskite,  $\varepsilon$  is the relative dielectric constant of MAPbCl<sub>3</sub> and  $\varepsilon_0$  is the vacuum permittivity. The quadratic dependence region is defined as SCLC region, where the carrier mobility is determined. To investigate the electron mobility, the electron-only devices are prepared respectively in the polycrystalline MAPbCl<sub>3</sub>/α-Ga<sub>2</sub>O<sub>3</sub> device and MAPbCl<sub>3</sub>/ZGO device. According to the above equation, the electron mobilities are determined to be  $4.95 \times 10^{-3} \text{ cm}^2 \text{ V}^{-1} \text{ S}^{-1}$  in the polycrystalline MAPbCl<sub>3</sub>/α-Ga<sub>2</sub>O<sub>3</sub> device.

The corresponding value is  $6.12 \times 10^{-3} \text{ cm}^2 \text{ V}^{-1} \text{ S}^{-1}$  in the MAPbCl<sub>3</sub>/ZGO device, which is slightly increased than the pristine device.

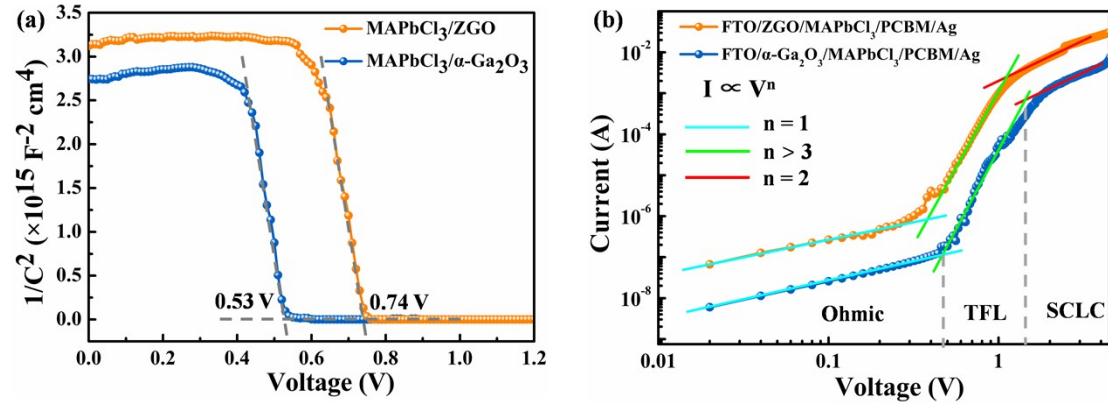

**Fig. S6** (a) Mott-Schottky curves and (b) SCLC curves of the polycrystalline MAPbCl<sub>3</sub>/α-Ga<sub>2</sub>O<sub>3</sub> device and polycrystalline MAPbCl<sub>3</sub>/ZGO device.

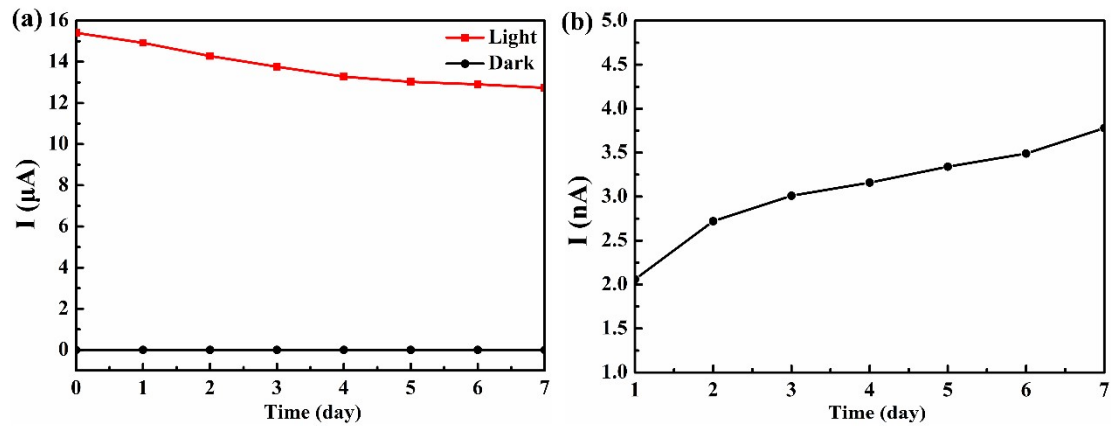

**Fig. S7** (a) Stability test with the polycrystalline MAPbCl<sub>3</sub>/ZGO photodetector stored in air at a temperature of 25°C and a humidity of 20-30%. (b) The changes of dark current in an enlarged image.



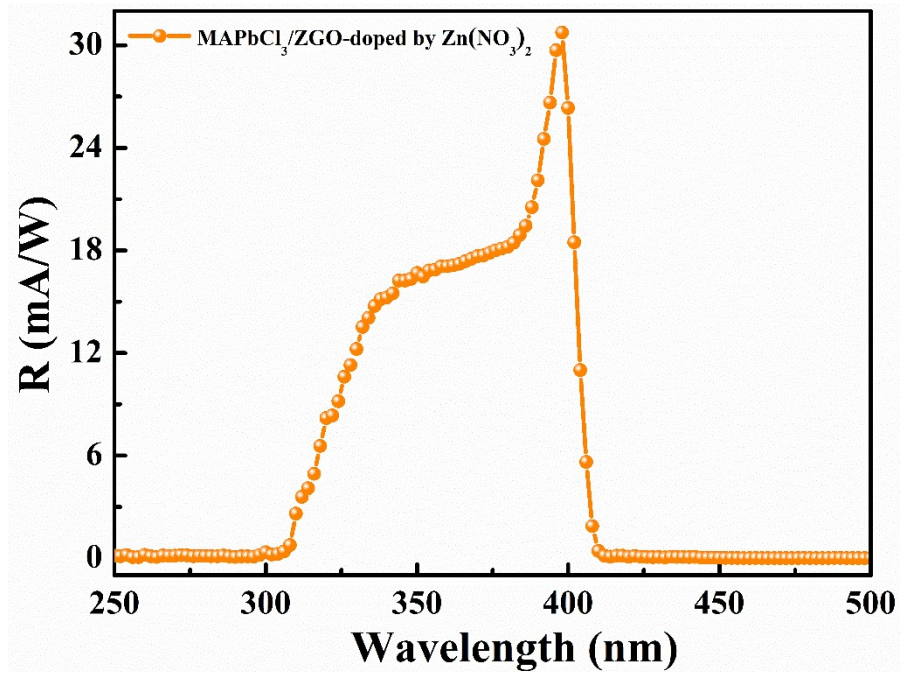

**Fig. S8** Responsivity of the polycrystalline MAPbCl<sub>3</sub>/ZGO (doped by Zn(NO<sub>3</sub>)<sub>2</sub>) device under zero bias.

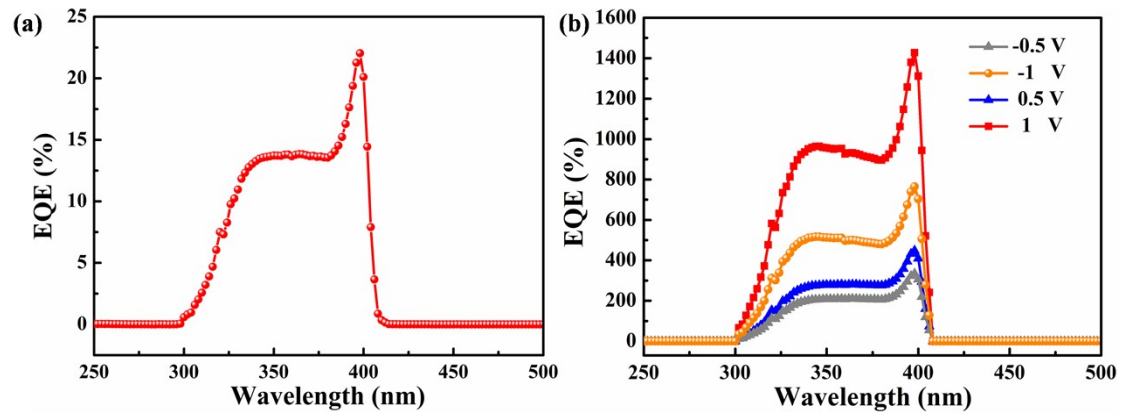

**Fig. S9** EQE of the polycrystalline MAPbCl<sub>3</sub>/ZGO device under (a) zero bias, and (b) -1 V, -0.5 V, 0.5 V, 1V.
